# Supplementary material for: Bio-functionalized magnetic nanoparticles for cost-effective adsorption of U(vi): experimental and theoretical investigation
Source: Royal Society of Chemistry journal article supplement (doi:10.1039/d3ra00799e), 2023-01-01
Supplement: d3ra00799e1.pdf [file d3ra00799e1.pdf]

Supplementary information for

# **Bio-functionalized Magnetic Nanoparticles for Cost-effective Adsorption of U(VI): Experimental and Theoretical Investigation**

**Chanchal Das<sup>a</sup>, Narendra Nath Ghosh<sup>b</sup>, Vandana Pulhani<sup>c</sup>, Goutam Biswas<sup>a\*</sup>, Pallavi Singhal<sup>c\*</sup>**

*<sup>a</sup>Department of Chemistry, Cooch Behar Panchanan Barma University, Cooch Behar, West Bengal, India 736101*

*<sup>b</sup>Department of Chemistry, University of Gour Banga, Mokdumpur, Malda-732103, India*

*<sup>c</sup>Environmental Monitoring and Assessment Division, Bhabha Atomic Research Centre, Mumbai 400085, India*

**\*E-mail:** [goutam@cbpbu.ac.in](mailto:goutam@cbpbu.ac.in) (Dr. Goutam Biswas)

[psinghal@barc.gov.in](mailto:psinghal@barc.gov.in), [pallavisinghal1987@gmail.com](mailto:pallavisinghal1987@gmail.com) (Dr. Pallavi Singhal)

*Phone : +91-22-2559 2349, Fax: +91-22-2550 5313*

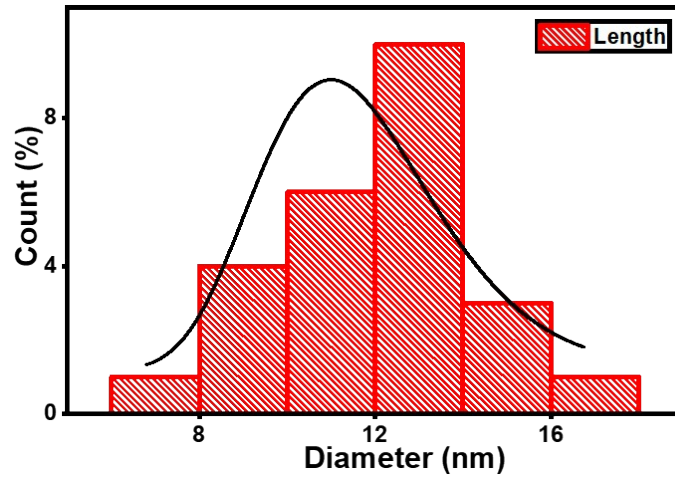

Figure S1: A histogram of size analysis from HRTEM image

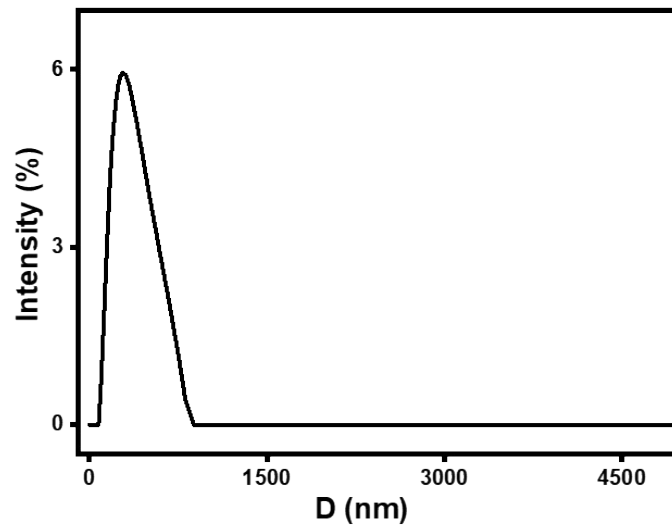

Figure S2: DLS analyzed hydrodynamic size of synthesized CT@MNPs

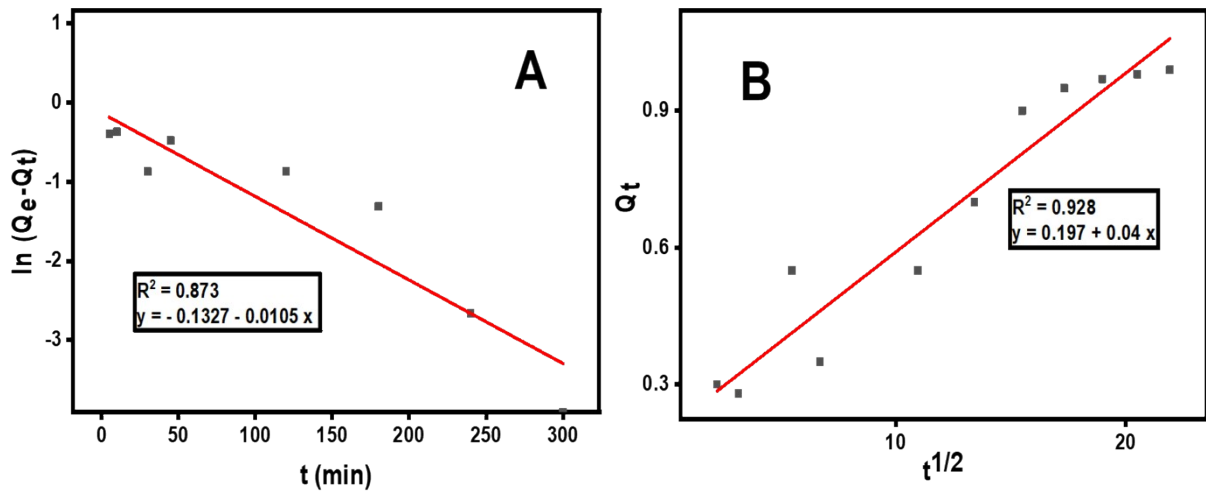

**Figure S3:** A. Pseudo-first-order kinetic model and B. Intraparticle diffusion model of the U(VI) adsorption onto CT@MNPs.

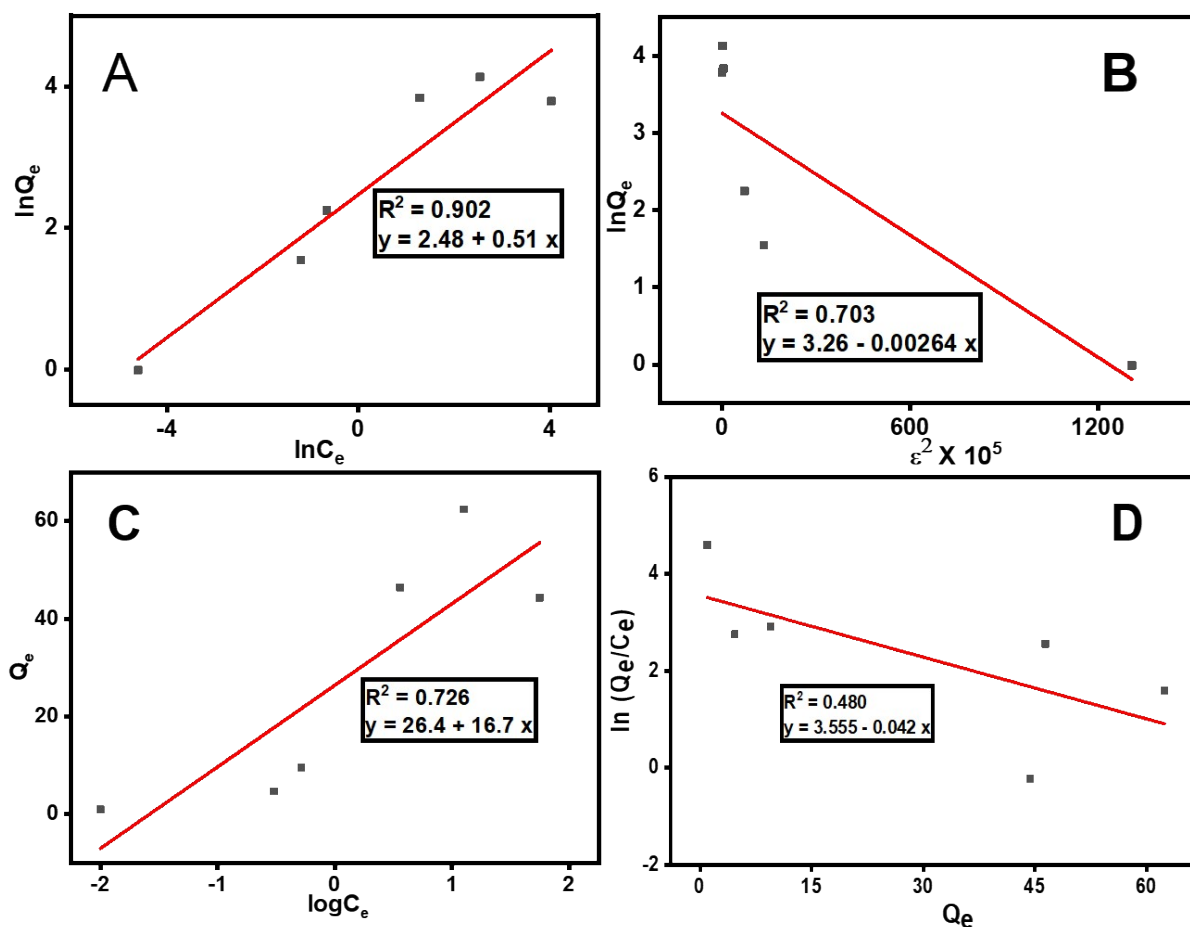

**Figure S4:** A. Freundlich, B. D-R, C. Temkin and D. Elovich isotherm model of adsorption of U(VI) onto CT@MNPs

**Table S1**

Various kinetic parameters for the adsorption of U(VI) onto CT@MNPs.

| Adsorbate | Concentration<br>(mg L <sup>-1</sup> ) | Order         | Q <sub>e</sub> (exp)<br>(mg g <sup>-1</sup> ) | Q <sub>e</sub> (cal)<br>(mg g <sup>-1</sup> ) | Rate constant* | R <sup>2</sup> |
|-----------|----------------------------------------|---------------|-----------------------------------------------|-----------------------------------------------|----------------|----------------|
| U(VI)     | 1.0                                    | Pseudo-first  |                                               | 83.4                                          | 0.0105         | 0.873          |
|           |                                        | Pseudo-second | 0.97                                          | 1.09                                          | 0.0160         | 0.964          |
|           |                                        | Intraparticle |                                               | NA*                                           | 0.0400         | 0.928          |

---

diffusion

---

\* Units for pseudo-first, pseudo-second order and intraparticle diffusion rate constants are  $\text{min}^{-1}$ ,  $\text{g mg}^{-1} \text{min}^{-1}$  and  $\text{mg g}^{-1} \text{min}^{-1/2}$ , respectively; \* NA = Not applicable.

**Table S2**

Various isotherm parameters for the adsorption of U(VI) onto CT@MNPs

| Langmuir isotherm                       |  |        |
|-----------------------------------------|--|--------|
| $K_L$ ( $\text{L mg}^{-1}$ )            |  | 2.095  |
| $R_L$                                   |  | 0.323  |
| $Q_{\text{max}}$ ( $\text{mg g}^{-1}$ ) |  | 45.45  |
| $R^2$                                   |  | 0.990  |
| Freundlich isotherm                     |  |        |
| $K_F$ ( $\text{mg g}^{-1}$ )            |  | 11.94  |
| $1/n$ ( $\text{mg L}^{-1}$ )            |  | 0.51   |
| $R^2$                                   |  | 0.902  |
| Dubinin-Radushkevich (D-R) isotherm     |  |        |
| $\beta$                                 |  | 0.003  |
| $E$ ( $\text{kJ mol}^{-1}$ )            |  | 13.76  |
| $Q_{\text{max}}$ ( $\text{mg g}^{-1}$ ) |  | 25.05  |
| $R^2$                                   |  | 0.703  |
| Temkin isotherm                         |  |        |
| $K_T$ ( $\text{L g}^{-1}$ )             |  | 38.09  |
| $B$ ( $\text{J mol}^{-1}$ )             |  | 341.67 |
| $R^2$                                   |  | 0.726  |
| Elovich isotherm                        |  |        |
| $K_E$                                   |  | 1.47   |
| $Q_{\text{max}}$                        |  | 23.81  |
| $R^2$                                   |  | 0.480  |

A comparison table regarding the maximum adsorption capacity is given (Table 3), which tells us that the CT@MNPs was much efficient towards the removal of U(VI).

**Table S3**

Production cost of CT@MNPs per kg, to use in wastewater purification.

| Raw materials                 | Cost* (USD)     | Quantity | Price (US\$) |
|-------------------------------|-----------------|----------|--------------|
| <i>Chemicals</i>              |                 |          |              |
| FeCl <sub>2</sub> , powder    | 0.39/kg         | 0.50 kg  | 0.19         |
| FeCl <sub>3</sub> (anhydrous) | 0.24/kg         | 1.29 kg  | 0.31         |
| NaOH                          | 0.26/kg         | 1.28 kg  | 0.33         |
| Water                         | 0.06/L          | 100 L    | 6.00         |
| <i>Cinnamomum tamala leaf</i> | 0/kg            | 5.71 kg  | 0            |
| <i>Others</i>                 |                 |          |              |
| Labor                         | 5.20/employee** | 1 day    | 5.20         |
| Electricity                   | 0.07/kWh        | 20 kWh   | 1.40         |
| Maintenance and insurance     |                 |          | 0.60         |
| <b>Total</b>                  |                 |          | <b>14.03</b> |

\* Price of water and other reagents is based on: IndiaMART (<https://www.indiamart.com>); \*\*

Employee salary (per day), according to government order: <https://wbic.gov.in/synopsys/July/2022>.
